# Supplementary material for: Structural transformation of confined iodine in the elliptical channels of AlPO4-11 crystals under high pressure
Source: Royal Society of Chemistry journal article supplement (doi:10.1039/c3cp55164d), 2014-01-01
Supplement: c3cp55164d1.pdf [file c3cp55164d1.pdf]

## Supporting Information

### Structural transformation of confined iodine in the elliptical channels of $\text{AlPO}_4\text{-11}$ crystals under high pressure

Shuanglong Chen,<sup>a</sup> Mingguang Yao,<sup>a</sup> Ye Yuan,<sup>a</sup> Fengxian Ma,<sup>a</sup> Zhaodong Liu,<sup>a</sup> Ran Liu,<sup>a</sup> Wen Cui,<sup>a</sup> Xue Yang,<sup>a</sup> Bo Liu,<sup>a</sup> Bo Zou,<sup>a</sup> Tian Cui,<sup>a</sup> Bingbing Liu<sup>a</sup>

<sup>a</sup> State Key Laboratory of Superhard Materials, Jilin University, Changchun 130012, P.R. China

Corresponding author: Bingbing Liu

E-mail: liubb@jlu.edu.cn, TEL: 86-431-85168256

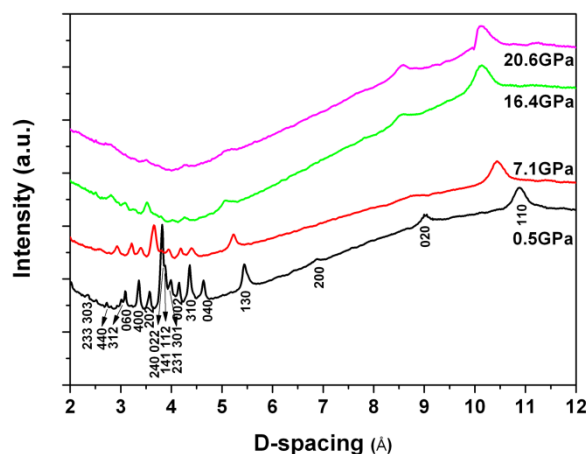

Fig. S1 Pressure dependence of the X-ray powder diffraction patterns of I@AEL crystals up to 20.6 GPa.

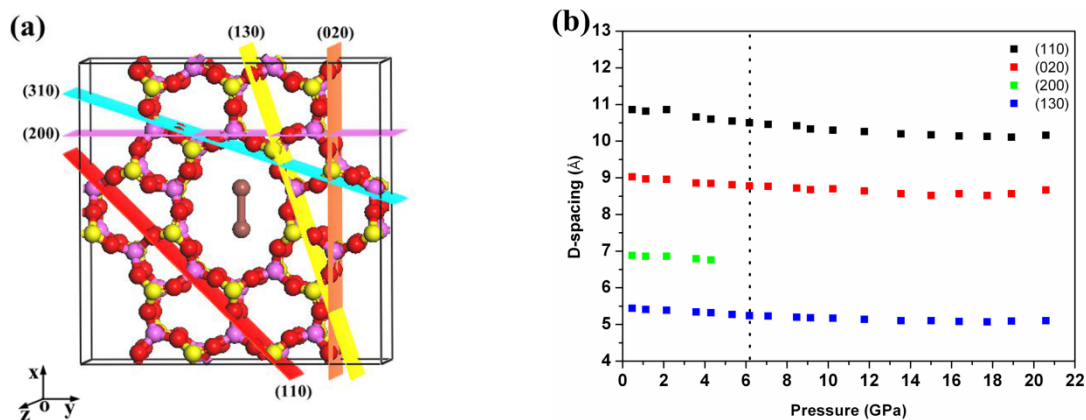

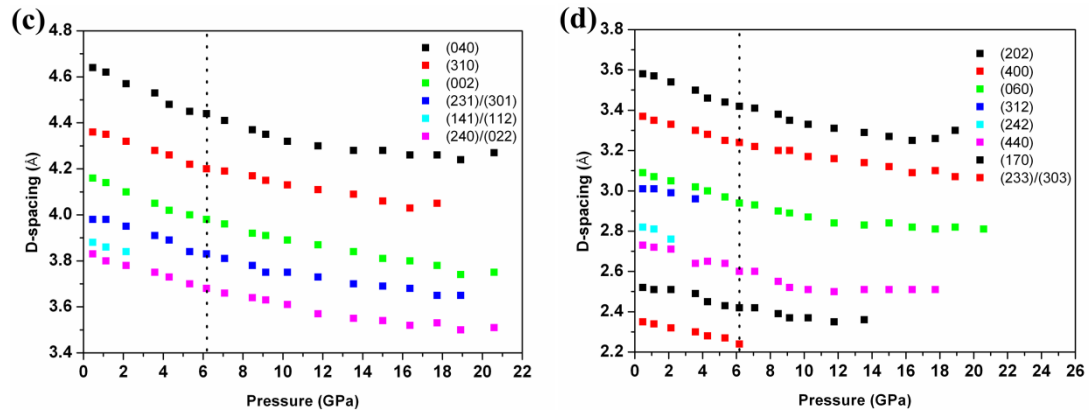

Fig. S2 (a) Schematic view of elliptical cross-section of AEL framework. (b) (c) (d) Pressure dependences of d-spacing of crystallographic plane for I@AEL.

Table. SI The pressure coefficients of d-spacing of crystallographic plane of I@AEL in different pressure ranges.

| plane<br>pressure | (110)  | (020)  | (200)  | (130)  | (040)  | (310)  | (002)  | (231)/<br>(301) | (141)/<br>(112) |
|-------------------|--------|--------|--------|--------|--------|--------|--------|-----------------|-----------------|
| <6GPa             | -0.066 | -0.043 | -0.031 | -0.034 | -0.037 | -0.033 | -0.033 | -0.029          | -0.024          |
| >6GPa             | -0.031 | -0.025 |        | -0.015 | -0.014 | -0.016 | -0.016 | -0.014          |                 |

| plane<br>pressure | (240)/<br>(022) | (202)  | (400)  | (060)  | (312)  | (242)  | (440)  | (170)  | (233)/<br>(303) |
|-------------------|-----------------|--------|--------|--------|--------|--------|--------|--------|-----------------|
| <6GPa             | -0.025          | -0.030 | -0.023 | -0.025 | -0.017 | -0.037 | -0.022 | -0.019 | -0.018          |
| >6GPa             | -0.014          | -0.017 | -0.013 | -0.010 |        |        | -0.007 | -0.010 |                 |
